# Supplementary material
Source: PubMed Central journal article supplement (PMC1986625)

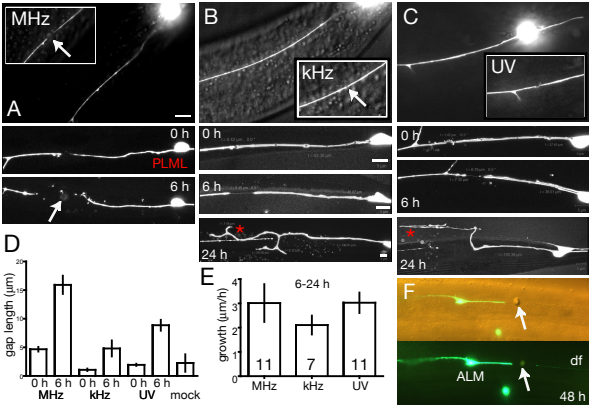

Supplement: pnas_0707001104_1.pdf [file pnas_0707001104_1.pdf]

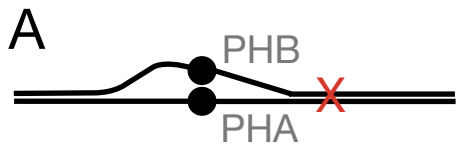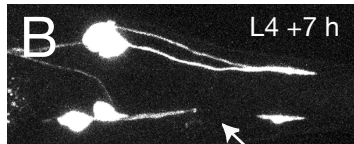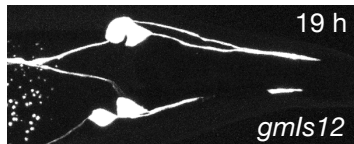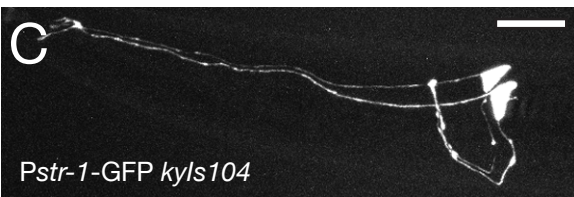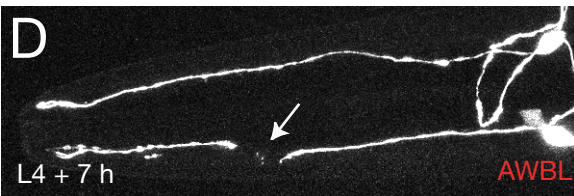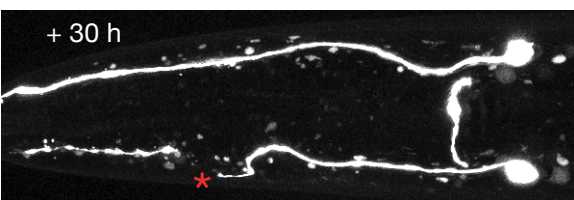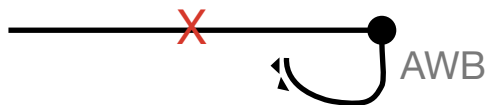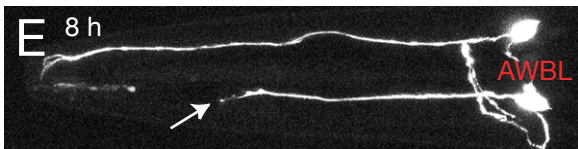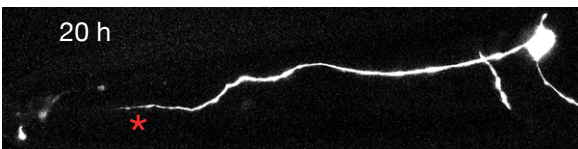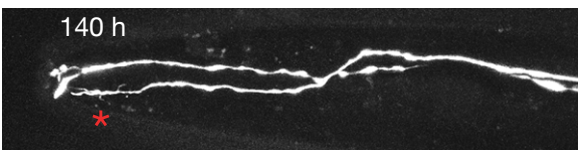

Supplement: pnas_0707001104_2.pdf [file pnas_0707001104_2.pdf]

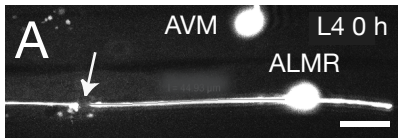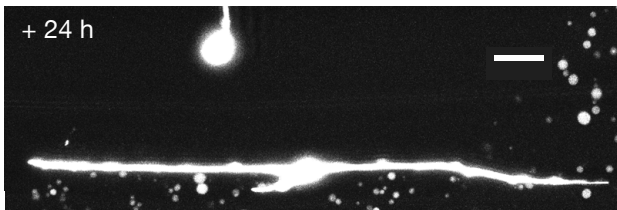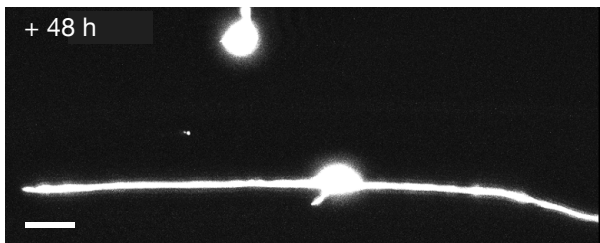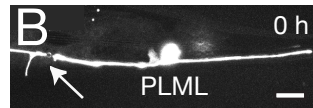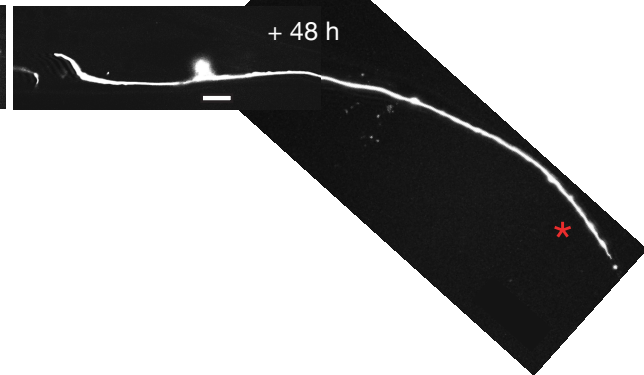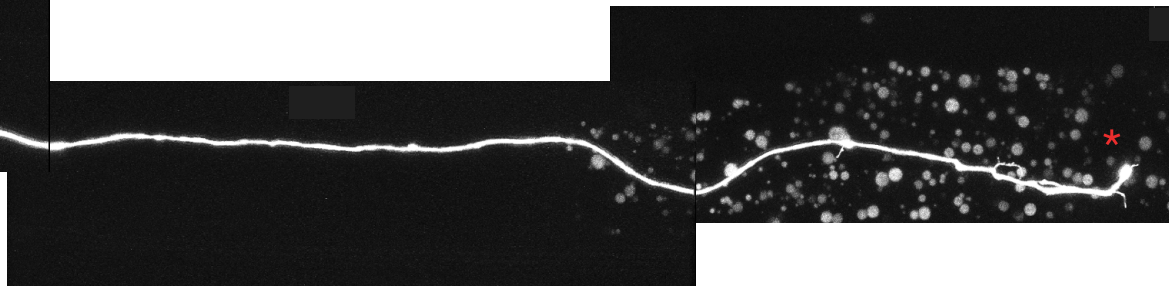

Supplement: pnas_0707001104_3.pdf [file pnas_0707001104_3.pdf]

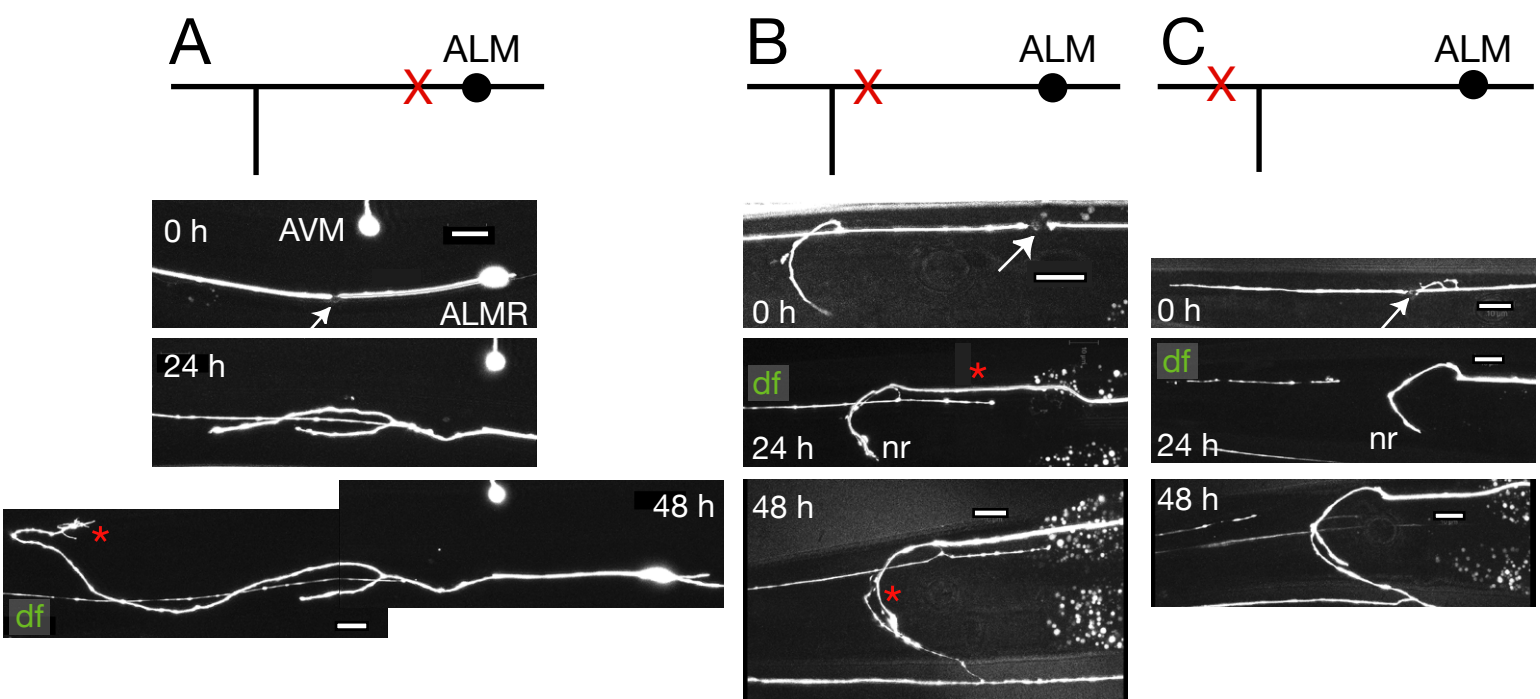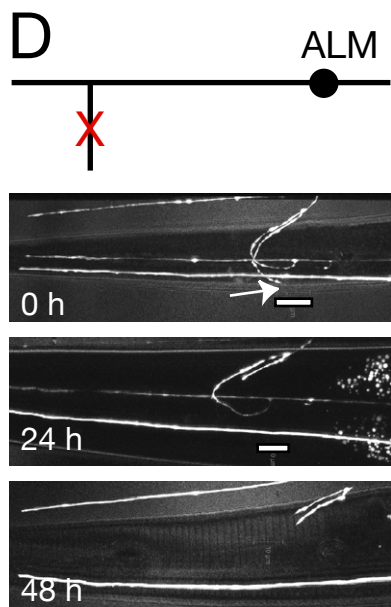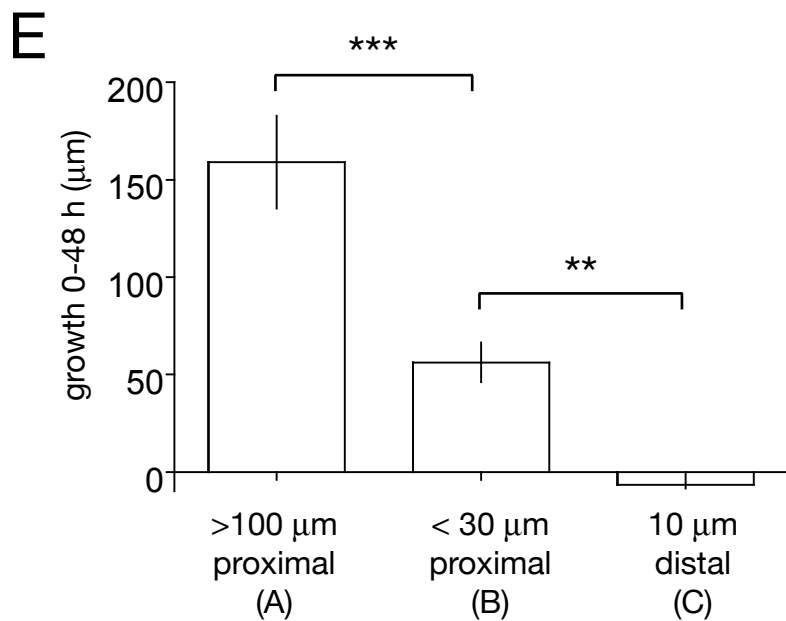

Supplement: pnas_0707001104_4.pdf [file pnas_0707001104_4.pdf]
